# Supplementary material for: Spin-state energetics and magnetic anisotropy in penta-coordinated Fe(iii) complexes with different axial and equatorial ligand environments
Source: Royal Society of Chemistry journal article supplement (doi:10.1039/d3cp02182c), 2023-01-01
Supplement: d3cp02182c2.pdf [file d3cp02182c2.pdf]

*Supporting Information for*  
**Spin-State Energetics and Magnetic Anisotropy in  
Penta-coordinated Fe(III) Complexes with Different Axial and  
Equatorial Ligand Environments**

Shalini Joshi, Sabyasachi Roy Chowdhury, and Sabyashachi Mishra\*

*Department of Chemistry, Indian Institute of Technology Kharagpur, Kharagpur, India*

---

\* mishra@chem.iitkgp.ac.in

TABLE S1: The optimized energy (in  $\text{cm}^{-1}$ ) of the complex  $\mathbf{Fe}_{\text{Cl}}^{\text{P}}$  in different spin-states with different functionals (M052X functional gives one imaginary frequency for the non-planar conformer of complex  $\mathbf{Fe}_{\text{Cl}}^{\text{P}}$  in the IS state). The energy of the intermediate-spin state with planar conformation of the phenyl rings is taken as reference.

| Functionals | Intermediate-Spin State |            | High-Spin State |            |
|-------------|-------------------------|------------|-----------------|------------|
|             | Planar                  | Non-Planar | Planar          | Non-Planar |
| CAM-B3LYP   | 0.0                     | -447.3     | 594.8           | 786.4      |
| B3LYP       | 0.0                     | -44.2      | 920.3           | 1095.3     |
| PBE         | 0.0                     | -156.9     | 3488.9          | 3420.1     |
| BLYP        | 0.0                     | 102.7      | 3150.5          | 3394.6     |
| M06L        | 0.0                     | -522.2     | -1631.0         | -1845.4    |
| M05         | 0.0                     | -437.9     | -2979.8         | -3102.2    |
| M052X       | 0.0                     | -468.6     | -2691.6         | -2657.9    |

TABLE S2: The comparison of the geometrical parameters and RMSD (with respect to the X-ray structure) of the complex  $\mathbf{Fe}_{\text{Cl}}^{\text{P}}(\text{np.})$  optimized in its intermediate-spin state with CAM-B3LYP, B3LYP, PBE functionals.

| Functional | Fe-equatorial ( $\text{\AA}$ ) | Fe-axial ( $\text{\AA}$ ) | $\angle\text{A-Fe-A}$ ( $^\circ$ ) | $\angle\text{E-Fe-E}$ ( $^\circ$ ) | RMSD ( $\text{\AA}$ ) |
|------------|--------------------------------|---------------------------|------------------------------------|------------------------------------|-----------------------|
| CAM-B3LYP  | 2.30, 2.26, 2.23               | 2.33                      | 177.4                              | 129.3, 117.7, 112.9                | 0.053                 |
| B3LYP      | 2.32, 2.28, 2.25               | 2.35                      | 177.1                              | 129.7, 118.1, 112.3                | 0.061                 |
| PBE        | 2.29, 2.25, 2.22               | 2.32                      | 176.1                              | 129.7, 118.8, 111.5                | 0.066                 |
| Experiment | 2.30, 2.25, 2.23               | 2.36                      | 175.1                              | 125.4, 117.5, 117.1                |                       |

TABLE S3: Energy of d-orbitals (in  $\text{cm}^{-1}$ ) of the modeled complexes. The energy of the  $d_{xz}$  orbital is taken as reference.

| Complex                                 | Planar   |          |          |               |           | Non-planar |          |          |               |           |
|-----------------------------------------|----------|----------|----------|---------------|-----------|------------|----------|----------|---------------|-----------|
|                                         | $d_{xz}$ | $d_{yz}$ | $d_{xy}$ | $d_{x^2-y^2}$ | $d_{z^2}$ | $d_{xz}$   | $d_{yz}$ | $d_{xy}$ | $d_{x^2-y^2}$ | $d_{z^2}$ |
| $\text{Fe}_{\text{Cl}}^{\text{P}}$      | 0        | 198      | 5223     | 5399          | 22299     | 0          | 614      | 5048     | 6057          | 22738     |
| $\text{Fe}_{\text{F}}^{\text{P}}$       | 0        | 2963     | 8164     | 10535         | 21816     | 0          | 2985     | 8164     | 10557         | 21860     |
| $\text{Fe}_{\text{Br}}^{\text{P}}$      | 0        | 593      | 4060     | 4587          | 23067     | 0          | 351      | 4082     | 4697          | 23022     |
| $\text{Fe}_{\text{I}}^{\text{P}}$       | 0        | 527      | 2721     | 3292          | 23396     | 0          | 329      | 2875     | 3885          | 24493     |
| $\text{Fe}_{\text{Cl}}^{\text{N}}$      | 0        | 922      | 1317     | 2348          | 9503      | 0          | 198      | 3665     | 4587          | 10973     |
| $\text{Fe}_{\text{Cl}}^{\text{As}}$     | 0        | 505      | 5333     | 5750          | 20982     | 0          | 680      | 5070     | 6145          | 20894     |
| $\text{Fe}_{\text{Br}}^{\text{As}}$     | 0        | 461      | 4214     | 4609          | 21706     | 0          | 373      | 4170     | 4806.5        | 21684     |
| $\text{Fe}_{\text{I}}^{\text{As}}$      | 0        | 373      | 2941     | 3358          | 22628     | 0          | 154      | 3051     | 3424          | 22584     |
| $\text{Fe}_{\text{Cl}}^{\text{N,P}}$    | 0        | 987      | 3687     | 4324          | 17075     | 0          | 439      | 4280     | 5114          | 18063     |
| $\text{Fe}_{\text{Cl}}^{\text{P,ac.}}$  | 0        | 329      | 5026     | 5531          | 21706     | 0          | 988      | 6409     | 4872          | 22079     |
| $\text{Fe}_{\text{Br}}^{\text{P,ac.}}$  | 0        | 198      | 3841     | 4236          | 22035     | 0          | 724      | 3841     | 5092          | 22364     |
| $\text{Fe}_{\text{I}}^{\text{P,ac.}}$   | 0        | 1273     | 4258     | 1449          | 12642     | 0          | 461      | 3599     | 2546          | 22628     |
| $\text{Fe}_{\text{Cl}}^{\text{As,ac.}}$ | 0        | 483      | 5245     | 5684          | 20214     | 0          | 483      | 5245     | 5684          | 20214     |
| $\text{Fe}_{\text{Br}}^{\text{As,ac.}}$ | 0        | 285      | 4411     | 4104          | 20816     | 0          | 285      | 4126     | 4411          | 20916     |
| $\text{Fe}_{\text{I}}^{\text{As,ac.}}$  | 0        | 241      | 2831     | 3073          | 21904     | 0          | 373      | 3665     | 2875          | 21991     |

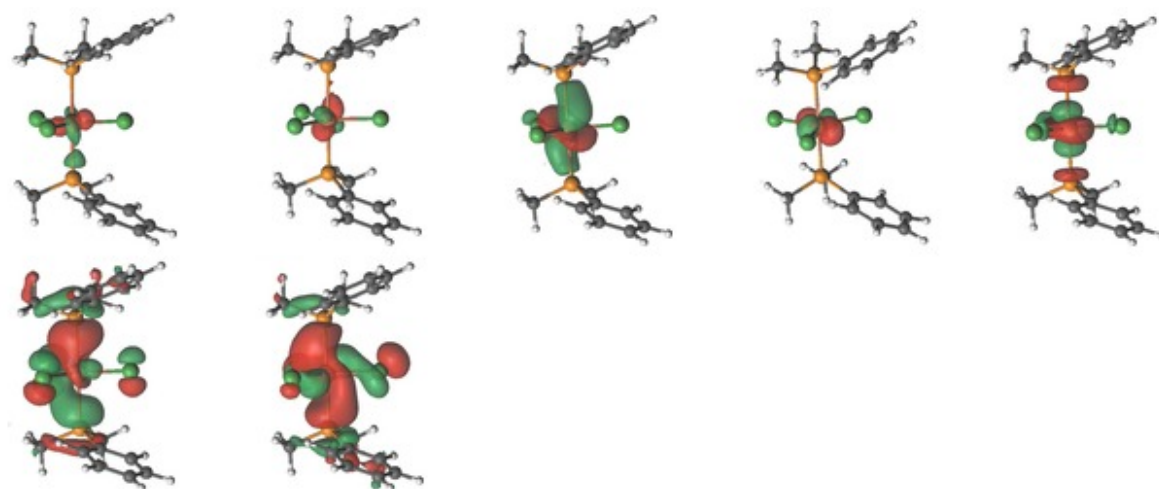

FIG. S1: The active-space (canonical) orbitals from (9,7) SA-CASSCF calculation for  $\text{Fe}_{\text{Cl}}^{\text{P}}(\text{np.})$  complex. The five orbitals in the upper row are (predominantly) metal d-orbitals, while the two orbitals in the lower row are ligand orbitals.

TABLE S4: DFT optimized geometrical parameters (distance in Å and angle in °) of Fe(III) complexes in the intermediate spin states. Here,  $\delta = \sum_{i=1}^3 |120 - \alpha_i|$  with  $\alpha_i$  representing the three equatorial angles.

| Complex                                       | Intermediate-Spin State |            |                 |          | High-Spin State  |            |                 |  |
|-----------------------------------------------|-------------------------|------------|-----------------|----------|------------------|------------|-----------------|--|
|                                               | Fe-equatorial           | Fe-axial   | $\angle$ A-Fe-A | $\delta$ | Fe-equatorial    | Fe-axial   | $\angle$ A-Fe-A |  |
| $\text{Fe}_{\text{Cl}}^{\text{P}}$ (pl.)      | 2.26, 2.26, 2.24        | 2.33       | 178.6           | 4        | 2.26, 2.23, 2.23 | 2.55       | 172.9           |  |
| $\text{Fe}_{\text{Cl}}^{\text{P}}$ (np.)      | 2.30, 2.26, 2.23        | 2.33       | 177.4           | 18       | 2.26, 2.23, 2.23 | 2.55       | 174.2           |  |
| $\text{Fe}_{\text{F}}^{\text{P}}$ (pl.)       | 1.93, 1.82, 1.79        | 2.31       | 169.5           | 52       | 1.83, 1.82, 1.81 | 2.56       | 169.0           |  |
| $\text{Fe}_{\text{F}}^{\text{P}}$ (np.)       | 1.93, 1.82, 1.79        | 2.31       | 169.5           | 52       | 1.83, 1.82, 1.81 | 2.56       | 169.0           |  |
| $\text{Fe}_{\text{Br}}^{\text{P}}$ (pl.)      | 2.44, 2.39, 2.39        | 2.34       | 177.3           | 15       | 2.41, 2.39, 2.39 | 2.55       | 175.7           |  |
| $\text{Fe}_{\text{Br}}^{\text{P}}$ (np.)      | 2.44, 2.39, 2.39        | 2.34       | 178.8           | 14       | 2.41, 2.40, 2.39 | 2.54       | 177.1           |  |
| $\text{Fe}_{\text{I}}^{\text{P}}$ (pl.)       | 2.61, 2.61, 2.65        | 2.36       | 178.5           | 16       | 2.61, 2.61, 2.61 | 2.56       | 178.7           |  |
| $\text{Fe}_{\text{I}}^{\text{P}}$ (np.)       | 2.58, 2.58, 2.58        | 2.35       | 179.6           | 21       | 2.62, 2.61, 2.61 | 2.55       | 179.0           |  |
| $\text{Fe}_{\text{Cl}}^{\text{N}}$ (pl.)      | 2.30, 2.23, 2.23        | 2.15       | 179.4           | 23       | 2.21, 2.21, 2.20 | 2.39       | 176.5           |  |
| $\text{Fe}_{\text{Cl}}^{\text{N}}$ (np.)      | 2.26, 2.26, 2.24        | 2.17       | 178.1           | 16       | 2.21, 2.19, 2.19 | 2.38       | 179.5           |  |
| $\text{Fe}_{\text{Cl}}^{\text{As}}$ (pl.)     | 2.29, 2.24, 2.24        | 2.41       | 175.2           | 11       | 2.25, 2.22, 2.22 | 2.65       | 173.5           |  |
| $\text{Fe}_{\text{Cl}}^{\text{As}}$ (np.)     | 2.29, 2.26, 2.22        | 2.41       | 175.9           | 20       | 2.25, 2.22, 2.22 | 2.65       | 173.4           |  |
| $\text{Fe}_{\text{Br}}^{\text{As}}$ (pl.)     | 2.44, 2.39, 2.39        | 2.41       | 176.3           | 12       | 2.41, 2.38, 2.38 | 2.64       | 174.2           |  |
| $\text{Fe}_{\text{Br}}^{\text{As}}$ (np.)     | 2.44, 2.40, 2.39        | 2.41       | 177.9           | 14       | 2.40, 2.38, 2.38 | 2.64       | 175.1           |  |
| $\text{Fe}_{\text{I}}^{\text{As}}$ (pl.)      | 2.65, 2.61, 2.61        | 2.43       | 177.4           | 13       | 2.61, 2.59, 2.59 | 2.64       | 176.5           |  |
| $\text{Fe}_{\text{I}}^{\text{As}}$ (np.)      | 2.65, 2.65, 2.61        | 2.43       | 178.5           | 10       | 2.61, 2.60, 2.60 | 2.63       | 179.0           |  |
| $\text{Fe}_{\text{Cl}}^{\text{N,P}}$ (pl.)    | 2.29, 2.24, 2.24        | 2.31, 2.18 | 178.7           | 18       | 2.23, 2.22, 2.22 | 2.54, 2.38 | 179.6           |  |
| $\text{Fe}_{\text{Cl}}^{\text{N,P}}$ (np.)    | 2.29, 2.24, 2.24        | 2.30, 2.17 | 179.2           | 16       | 2.23, 2.22, 2.22 | 2.53, 2.37 | 178.4           |  |
| $\text{Fe}_{\text{Cl}}^{\text{P,ac.}}$ (pl.)  | 2.28, 2.24, 2.23        | 2.33       | 171.6           | 10       | 2.25, 2.23, 2.21 | 2.57       | 168.7           |  |
| $\text{Fe}_{\text{Cl}}^{\text{P,ac.}}$ (np.)  | 2.30, 2.24, 2.22        | 2.33       | 175.6           | 32       | 2.25, 2.23, 2.20 | 2.58       | 172.7           |  |
| $\text{Fe}_{\text{Br}}^{\text{P,ac.}}$ (pl.)  | 2.43, 2.39, 2.39        | 2.34       | 171.2           | 8        | 2.41, 2.39, 2.36 | 2.56       | 167.5           |  |
| $\text{Fe}_{\text{Br}}^{\text{P,ac.}}$ (np.)  | 2.45, 2.40, 2.38        | 2.35       | 175.0           | 29       | 2.40, 2.39, 2.35 | 2.58       | 172.7           |  |
| $\text{Fe}_{\text{I}}^{\text{P,ac.}}$ (pl.)   | 2.66, 2.61, 2.59        | 2.37       | 174.5           | 29       | 2.62, 2.61, 2.57 | 2.58       | 169.9           |  |
| $\text{Fe}_{\text{I}}^{\text{P,ac.}}$ (np.)   | 2.67, 2.61, 2.59        | 2.37       | 174.2           | 40       | 2.60, 2.60, 2.56 | 2.60       | 172.5           |  |
| $\text{Fe}_{\text{Cl}}^{\text{As,ac.}}$ (pl.) | 2.29, 2.26, 2.22        | 2.42       | 174.5           | 10       | 2.20, 2.26, 2.26 | 2.35       | 174.1           |  |
| $\text{Fe}_{\text{Cl}}^{\text{As,ac.}}$ (pl.) | 2.29, 2.26, 2.22        | 2.42       | 174.5           | 10       | 2.22, 2.25, 2.31 | 2.33       | 171.4           |  |
| $\text{Fe}_{\text{Br}}^{\text{As,ac.}}$ (pl.) | 2.44, 2.40, 2.38        | 2.42       | 173.6           | 8        | 2.41, 2.37, 2.37 | 2.65       | 171.7           |  |
| $\text{Fe}_{\text{Br}}^{\text{As,ac.}}$ (pl.) | 2.44, 2.40, 2.38        | 2.42       | 173.6           | 8        | 2.40, 2.38, 2.35 | 2.67       | 174.3           |  |
| $\text{Fe}_{\text{I}}^{\text{As,ac.}}$ (pl.)  | 2.65, 2.61, 2.60        | 2.43       | 172.4           | 7        | 2.62, 2.59, 2.57 | 2.66       | 170.2           |  |
| $\text{Fe}_{\text{I}}^{\text{As,ac.}}$ (np.)  | 2.66, 2.62, 2.59        | 2.44       | 176.2           | 22       | 2.61, 2.59, 2.56 | 2.67       | 174.6           |  |

TABLE S5: The configuration state functions (CSF) of the Ground state and lower excited states of the non-planar conformer of all complexes with CSF weight > 5% from a CAS(9,7) calculation. The first two (of the 7 active) orbitals are of ligand type and the next five are of metal d-orbitals. The ground, first, second, and third excited states have dominant electronic configurations  $d_{xz}^2 d_{yz}^1 d_{xy}^1 d_{x^2-y^2}^1 d_{z^2}^0$ ,  $d_{xz}^1 d_{yz}^2 d_{xy}^1 d_{x^2-y^2}^1 d_{z^2}^0$ ,  $d_{xz}^1 d_{yz}^1 d_{xy}^2 d_{x^2-y^2}^1 d_{z^2}^0$ , and  $d_{xz}^1 d_{yz}^1 d_{xy}^1 d_{x^2-y^2}^2 d_{z^2}^0$ , respectively. The occupancy of the orbitals is given by 2, u/d (1 electron), and 0.

| Complex                                | Ground state | weight(%) | Ist excited state | weight(%) |
|----------------------------------------|--------------|-----------|-------------------|-----------|
| $\text{Fe}_{\text{Cl}}^{\text{P}}$     | 222uuu0      | 78.2      | 22u2uu0           | 78.8      |
|                                        | u22duuu      | 8.7       | u2d2uuu           | 8.7       |
|                                        | 022uuu2      | 5.3       | 02u2uu2           | 5.4       |
| $\text{Fe}_{\text{Br}}^{\text{P}}$     | 222uuu0      | 79.1      | 22u2uu0           | 79.3      |
|                                        | u22duuu      | 8.1       | u2d2uuu           | 8.1       |
|                                        | 022uuu2      | 6.1       | 02u2uu2           | 6.2       |
| $\text{Fe}_{\text{I}}^{\text{P}}$      | 222uuu0      | 80.5      | 22u2uu0           | 80.6      |
|                                        | u22duuu      | 6.9       | u2d2uuu           | 6.9       |
|                                        | 022uuu2      | 6.7       | 02u2uu2           | 6.7       |
| $\text{Fe}_{\text{Br}}^{\text{As}}$    | 222uuu0      | 77.7      | 22u2uu0           | 77.9      |
|                                        | u22duuu      | 8.6       | u2d2uuu           | 8.6       |
|                                        | 022uuu2      | 6.8       | 02u2uu2           | 6.8       |
| $\text{Fe}_{\text{I}}^{\text{As}}$     | 222uuu0      | 78.7      | 22u2uu0           | 78.6      |
|                                        | u22duuu      | 7.5       | u2d2uuu           | 7.5       |
|                                        | 022uuu2      | 7.7       | 02u2uu2           | 7.7       |
| $\text{Fe}_{\text{Cl}}^{\text{P,ac.}}$ | 222uuu0      | 76.4      | 22u2uu0           | 77.4      |
|                                        | u22duuu      | 9.5       | u2d2uuu           | 9.5       |
|                                        | 022uuu2      | 5.5       | 02u2uu2           | 5.6       |
| $\text{Fe}_{\text{Br}}^{\text{P,ac.}}$ | 222uuu0      | 77.6      | 22u2uu0           | 78.1      |
|                                        | u22duuu      | 8.7       | u2d2uuu           | 8.9       |
|                                        | 022uuu2      | 6.4       | 02u2uu2           | 6.4       |
| $\text{Fe}_{\text{I}}^{\text{P,ac.}}$  | 222uuu0      | 78.1      | 22u2uu0           | 77.9      |
|                                        | u22duuu      | 8.1       | u2d2uuu           | 8.2       |
|                                        | 022uuu2      | 7.3       | 02u2uu2           | 7.4       |
| $\text{Fe}_{\text{I}}^{\text{As,ac.}}$ | 222uuu0      | 77.6      | 22u2uu0           | 77.4      |
|                                        | u22duuu      | 7.9       | u2d2uuu           | 8.0       |
|                                        | 022uuu2      | 8.0       | 02u2uu2           | 8.1       |

TABLE S6: Same as in Table S5 for the planar conformers of the complexes.

| Complex                                 | Ground state weight(%) | Ist excited state weight(%) |         |      |
|-----------------------------------------|------------------------|-----------------------------|---------|------|
| $\text{Fe}_{\text{Cl}}^{\text{P}}$      | 222uuu0                | 78.9                        | 22u2uu0 | 79.1 |
|                                         | u22duuu                | 8.7                         | u2d2uuu | 8.7  |
|                                         | 022uuu2                | 5.1                         | 02u2uu2 | 5.1  |
| $\text{Fe}_{\text{Br}}^{\text{P}}$      | 222uuu0                | 78.9                        | 22u2uu0 | 79.5 |
|                                         | u22duuu                | 8.3                         | u2d2uuu | 8.2  |
|                                         | 022uuu2                | 5.9                         | 02u2uu2 | 5.9  |
| $\text{Fe}_{\text{I}}^{\text{P}}$       | 222uuu0                | 78.6                        | 22u2uu0 | 79.2 |
|                                         | u22duuu                | 7.9                         | u2d2uuu | 7.8  |
|                                         | 022uuu2                | 6.9                         | 02u2uu2 | 6.7  |
| $\text{Fe}_{\text{Br}}^{\text{As}}$     | 222uuu0                | 77.8                        | 22u2uu0 | 78.3 |
|                                         | u22duuu                | 8.7                         | u2d2uuu | 8.6  |
|                                         | 022uuu2                | 6.5                         | 02u2uu2 | 6.6  |
| $\text{Fe}_{\text{I}}^{\text{As}}$      | 222uuu0                | 78.4                        | 22u2uu0 | 78.7 |
|                                         | u22duuu                | 7.8                         | u2d2uuu | 7.7  |
|                                         | 022uuu2                | 7.5                         | 02u2uu2 | 7.5  |
| $\text{Fe}_{\text{Cl}}^{\text{P,ac.}}$  | 222uuu0                | 77.8                        | 22u2uu0 | 78.1 |
|                                         | u22duuu                | 9.1                         | u2d2uuu | 8.9  |
|                                         | 022uuu2                | 5.2                         | 02u2uu2 | 5.2  |
| $\text{Fe}_{\text{Br}}^{\text{P,ac.}}$  | 222uuu0                | 73.9                        | 22u2uu0 | 74.1 |
|                                         | u22duuu                | 8.2                         | u2d2uuu | 8.0  |
|                                         | 022uuu2                | 5.7                         | 02u2uu2 | 5.7  |
| $\text{Fe}_{\text{I}}^{\text{P,ac.}}$   | 222uu0u                | 22.6                        | 22uu20u | 22.5 |
|                                         | u22duuu                | 43.9                        | u2du2uu | 43.1 |
|                                         | u22uduu                | 13.0                        | u2ud2uu | 14.5 |
|                                         | 022uu2u                | 9.0                         | u2uu2ud | 5.1  |
|                                         | -                      | -                           | 02uu22u | 9.2  |
| $\text{Fe}_{\text{Cl}}^{\text{As,ac.}}$ | 222uuu0                | 76.1                        | 22u2uu0 | 76.4 |
|                                         | u22duuu                | 10.1                        | u2d2uuu | 10.0 |
|                                         | 022uuu2                | 5.9                         | 02u2uu2 | 5.9  |
| $\text{Fe}_{\text{Br}}^{\text{As,ac.}}$ | 222uuu0                | 76.7                        | 22u2uu0 | 76.7 |
|                                         | u22duuu                | 9.1                         | u2d2uuu | 9.0  |
|                                         | 022uuu2                | 6.7                         | 02u2uu2 | 6.6  |
| $\text{Fe}_{\text{I}}^{\text{As,ac.}}$  | 222uuu0                | 55.5                        | 222uuu0 | 21.5 |
|                                         | 22u2uu0                | 22.3                        | 22u2uu0 | 55.5 |
|                                         | u22duuu                | 5.7                         | u2d2uuu | 5.5  |
|                                         | 022uuu2                | 5.5                         | 02u2uu2 | 5.4  |

TABLE S7: Composition of the spin-orbit coupled states (or Kramer's doublets) of planar conformers in terms of the scalar-relativistic states.

| Complex                                | KD1/KD2                                                  | KD3/KD4                                                                      |
|----------------------------------------|----------------------------------------------------------|------------------------------------------------------------------------------|
| $\text{Fe}_{\text{Cl}}^{\text{P}}$     | $0.76 Q_0\rangle+0.23 Q_1\rangle$                        | $0.93 Q_0\rangle+0.05 Q_1\rangle$                                            |
| $\text{Fe}_{\text{F}}^{\text{P}}$      |                                                          |                                                                              |
| $\text{Fe}_{\text{Br}}^{\text{P}}$     | $0.92 Q_0\rangle+0.07 Q_1\rangle$                        | $0.98 Q_0\rangle+0.01 Q_1\rangle$                                            |
| $\text{Fe}_{\text{I}}^{\text{P}}$      | $0.90 Q_0\rangle+0.08 Q_1\rangle+0.01 Q_2\rangle$        | $0.97 Q_0\rangle+0.01 Q_1\rangle+0.01 Q_2\rangle$                            |
| $\text{Fe}_{\text{Cl}}^{\text{N}}$     |                                                          |                                                                              |
| $\text{Fe}_{\text{Cl}}^{\text{As}}$    |                                                          |                                                                              |
| $\text{Fe}_{\text{Br}}^{\text{As}}$    | $0.89 Q_0\rangle+0.10 Q_1\rangle$                        | $0.98 Q_0\rangle+0.02 Q_1\rangle$                                            |
| $\text{Fe}_{\text{I}}^{\text{As}}$     | $0.87 Q_0\rangle+0.12 Q_1\rangle$                        | $0.97 Q_0\rangle+0.02 Q_1\rangle$                                            |
| $\text{Fe}_{\text{Cl}}^{\text{N,P}}$   |                                                          |                                                                              |
| $\text{Fe}_{\text{Cl}}^{\text{P,ac}}$  | $0.84 Q_0\rangle+0.16 Q_1\rangle$                        | $0.97 Q_0\rangle+0.03 Q_1\rangle$                                            |
| $\text{Fe}_{\text{Br}}^{\text{P,ac}}$  | $0.77 Q_0\rangle+0.22 Q_1\rangle$                        | $0.94 Q_0\rangle+0.05 Q_1\rangle$                                            |
| $\text{Fe}_{\text{I}}^{\text{P,ac}}$   | $0.97 S_{12}\rangle+0.02 S_{13}\rangle+0.004 Q_1\rangle$ | $0.98 S_{12}\rangle+0.01 S_{13}\rangle+0.003 S_{14}\rangle+0.003 Q_1\rangle$ |
| $\text{Fe}_{\text{Cl}}^{\text{As,ac}}$ | $0.90 Q_0\rangle+0.10 Q_1\rangle$                        | $0.98 Q_0\rangle+0.02 Q_1\rangle$                                            |
| $\text{Fe}_{\text{Br}}^{\text{As,ac}}$ | $0.85 Q_0\rangle+0.14 Q_1\rangle$                        | $0.97 Q_0\rangle+0.02 Q_1\rangle$                                            |
| $\text{Fe}_{\text{I}}^{\text{As,ac}}$  | $0.79 Q_0\rangle+0.20 Q_1\rangle+0.01 Q_2\rangle$        | $0.94 Q_0\rangle+0.04 Q_1\rangle+0.01 Q_2\rangle$                            |

TABLE S8: Composition of the spin-orbit coupled states (or Kramer's doublets) of non-planar conformers in terms of the scalar-relativistic states.

| Complex                                | KD1/KD2                                           | KD3/KD4                                                           |
|----------------------------------------|---------------------------------------------------|-------------------------------------------------------------------|
| $\text{Fe}_{\text{Cl}}^{\text{P}}$     | $0.91 Q_0\rangle+0.08 Q_1\rangle$                 | $0.98 Q_0\rangle+0.01 Q_1\rangle$                                 |
| $\text{Fe}_{\text{F}}^{\text{P}}$      |                                                   |                                                                   |
| $\text{Fe}_{\text{Br}}^{\text{P}}$     | $0.83 Q_0\rangle+0.15 Q_1\rangle$                 | $0.96 Q_0\rangle+0.02 Q_1\rangle$                                 |
| $\text{Fe}_{\text{I}}^{\text{P}}$      | $0.80 Q_0\rangle+0.18 Q_1\rangle+0.01 Q_2\rangle$ | $0.94 Q_0\rangle+0.03 Q_1\rangle+0.01 Q_2\rangle$                 |
| $\text{Fe}_{\text{Cl}}^{\text{N}}$     |                                                   |                                                                   |
| $\text{Fe}_{\text{Cl}}^{\text{As}}$    |                                                   |                                                                   |
| $\text{Fe}_{\text{Br}}^{\text{As}}$    | $0.85 Q_0\rangle+0.14 Q_1\rangle$                 | $0.96 Q_0\rangle+0.02 Q_1\rangle$                                 |
| $\text{Fe}_{\text{I}}^{\text{As}}$     | $0.76 Q_0\rangle+0.23 Q_1\rangle$                 | $0.93 Q_0\rangle+0.06 Q_1\rangle$                                 |
| $\text{Fe}_{\text{Cl}}^{\text{N,P}}$   |                                                   |                                                                   |
| $\text{Fe}_{\text{Cl}}^{\text{P,ac}}$  | $0.96 Q_0\rangle+0.04 Q_1\rangle$                 | $0.99 Q_0\rangle+0.01 Q_1\rangle$                                 |
| $\text{Fe}_{\text{Br}}^{\text{P,ac}}$  | $0.93 Q_0\rangle+0.06 Q_1\rangle$                 | $0.98 Q_0\rangle+0.01 Q_1\rangle$                                 |
| $\text{Fe}_{\text{I}}^{\text{P,ac}}$   | $0.91 Q_0\rangle+0.08 Q_1\rangle+0.01 Q_3\rangle$ | $0.97 Q_0\rangle+0.01 Q_1\rangle+0.01 Q_3\rangle$                 |
| $\text{Fe}_{\text{Cl}}^{\text{As,ac}}$ | $0.90 Q_0\rangle+0.10 Q_1\rangle$                 | $0.98 Q_0\rangle+0.02 Q_1\rangle$                                 |
| $\text{Fe}_{\text{Br}}^{\text{As,ac}}$ | $0.85 Q_0\rangle+0.14 Q_1\rangle$                 | $0.97 Q_0\rangle+0.03 Q_1\rangle$                                 |
| $\text{Fe}_{\text{I}}^{\text{As,ac}}$  | $0.88 Q_0\rangle+0.10 Q_1\rangle+0.01 Q_2\rangle$ | $0.97 Q_0\rangle+0.02 Q_1\rangle+0.01 Q_2\rangle+0.01 Q_3\rangle$ |



TABLE S9: The computed  $g$ -tensors for the lowest pair of Kramer's doublet of complexes in the intermediate spin state. The angle (in  $^\circ$ ) represents the deviation of the magnetization axis of excited spin-orbit states from the principal anisotropic axis. For complexes  $\mathbf{Fe}_{\text{Cl}}^{\text{As,ac.}}$  and  $\mathbf{Fe}_{\text{Br}}^{\text{As,ac.}}$ , only planar conformation exists.

| Complex                                   | Planar |       |       |       |       | Non-planar |       |       |       |       |
|-------------------------------------------|--------|-------|-------|-------|-------|------------|-------|-------|-------|-------|
|                                           | Energy | $g_x$ | $g_y$ | $g_z$ | angle | Energy     | $g_x$ | $g_y$ | $g_z$ | angle |
| $\mathbf{Fe}_{\text{Cl}}^{\text{P}}$      | 0      | 0.02  | 0.02  | 7.59  |       | 0          | 0.20  | 0.20  | 7.05  |       |
|                                           | 78     | 3.69  | 3.65  | 2.87  | 0     | 41         | 4.24  | 3.88  | 2.41  | 0     |
| $\mathbf{Fe}_{\text{Br}}^{\text{P}}$      | 0      | 0.06  | 0.06  | 7.0   |       | 0          | 0.12  | 0.12  | 7.39  |       |
|                                           | 35     | 4.18  | 4.05  | 2.38  | 0     | 58         | 4.08  | 3.85  | 2.64  | 0     |
| $\mathbf{Fe}_{\text{I}}^{\text{P}}$       | 0      | 0.50  | 0.53  | 7.01  |       | 0          | 0.82  | 0.93  | 7.30  |       |
|                                           | 32     | 4.67  | 3.68  | 2.36  | 0     | 59         | 2.56  | 3.14  | 4.69  | 31    |
| $\mathbf{Fe}_{\text{Br}}^{\text{As}}$     | 0      | 0.01  | 0.01  | 7.18  |       | 0          | 0.13  | 0.14  | 7.32  |       |
|                                           | 45     | 4.06  | 4.06  | 2.48  | 0     | 55         | 4.12  | 3.87  | 2.59  | 0     |
| $\mathbf{Fe}_{\text{I}}^{\text{As}}$      | 0      | 0.18  | 0.19  | 7.21  |       | 0          | 0.18  | 0.18  | 7.59  |       |
|                                           | 42     | 4.30  | 3.94  | 2.51  | 0     | 69         | 3.96  | 3.64  | 2.87  | 0     |
| $\mathbf{Fe}_{\text{Cl}}^{\text{P,ac.}}$  | 0      | 0.15  | 0.16  | 7.37  |       | 0          | 0.15  | 0.16  | 6.74  |       |
|                                           | 60     | 4.04  | 3.79  | 2.61  | 0     | 24         | 4.28  | 3.97  | 2.26  | 0     |
| $\mathbf{Fe}_{\text{Br}}^{\text{P,ac.}}$  | 0      | 0.22  | 0.23  | 7.55  |       | 0          | 0.45  | 0.48  | 6.85  |       |
|                                           | 72     | 3.93  | 3.57  | 2.82  | 0     | 29         | 4.58  | 3.68  | 2.29  | 0     |
| $\mathbf{Fe}_{\text{I}}^{\text{P,ac.}}$   | 0      | 0.01  | 0.01  | 10.41 |       | 0          | 1.33  | 1.72  | 6.59  |       |
|                                           | 5      | 1.23  | 1.28  | 6.14  | 0     | 32         | 1.97  | 2.57  | 5.47  | 60    |
| $\mathbf{Fe}_{\text{Cl}}^{\text{As,ac.}}$ | 0      | 0.18  | 0.19  | 7.15  |       |            |       |       |       |       |
|                                           | 47     | 4.17  | 3.87  | 2.46  |       |            |       |       |       |       |
| $\mathbf{Fe}_{\text{Br}}^{\text{As,ac.}}$ | 0      | 0.20  | 0.20  | 7.32  |       |            |       |       |       |       |
|                                           | 55     | 4.15  | 3.82  | 2.58  | 0     |            |       |       |       |       |
| $\mathbf{Fe}_{\text{I}}^{\text{As,ac.}}$  | 0      | 0.37  | 0.40  | 7.47  |       | 0          | 0.73  | 0.82  | 7.05  |       |
|                                           | 63     | 4.23  | 3.56  | 2.74  | 0     | 39         | 2.37  | 3.38  | 4.85  | 31    |

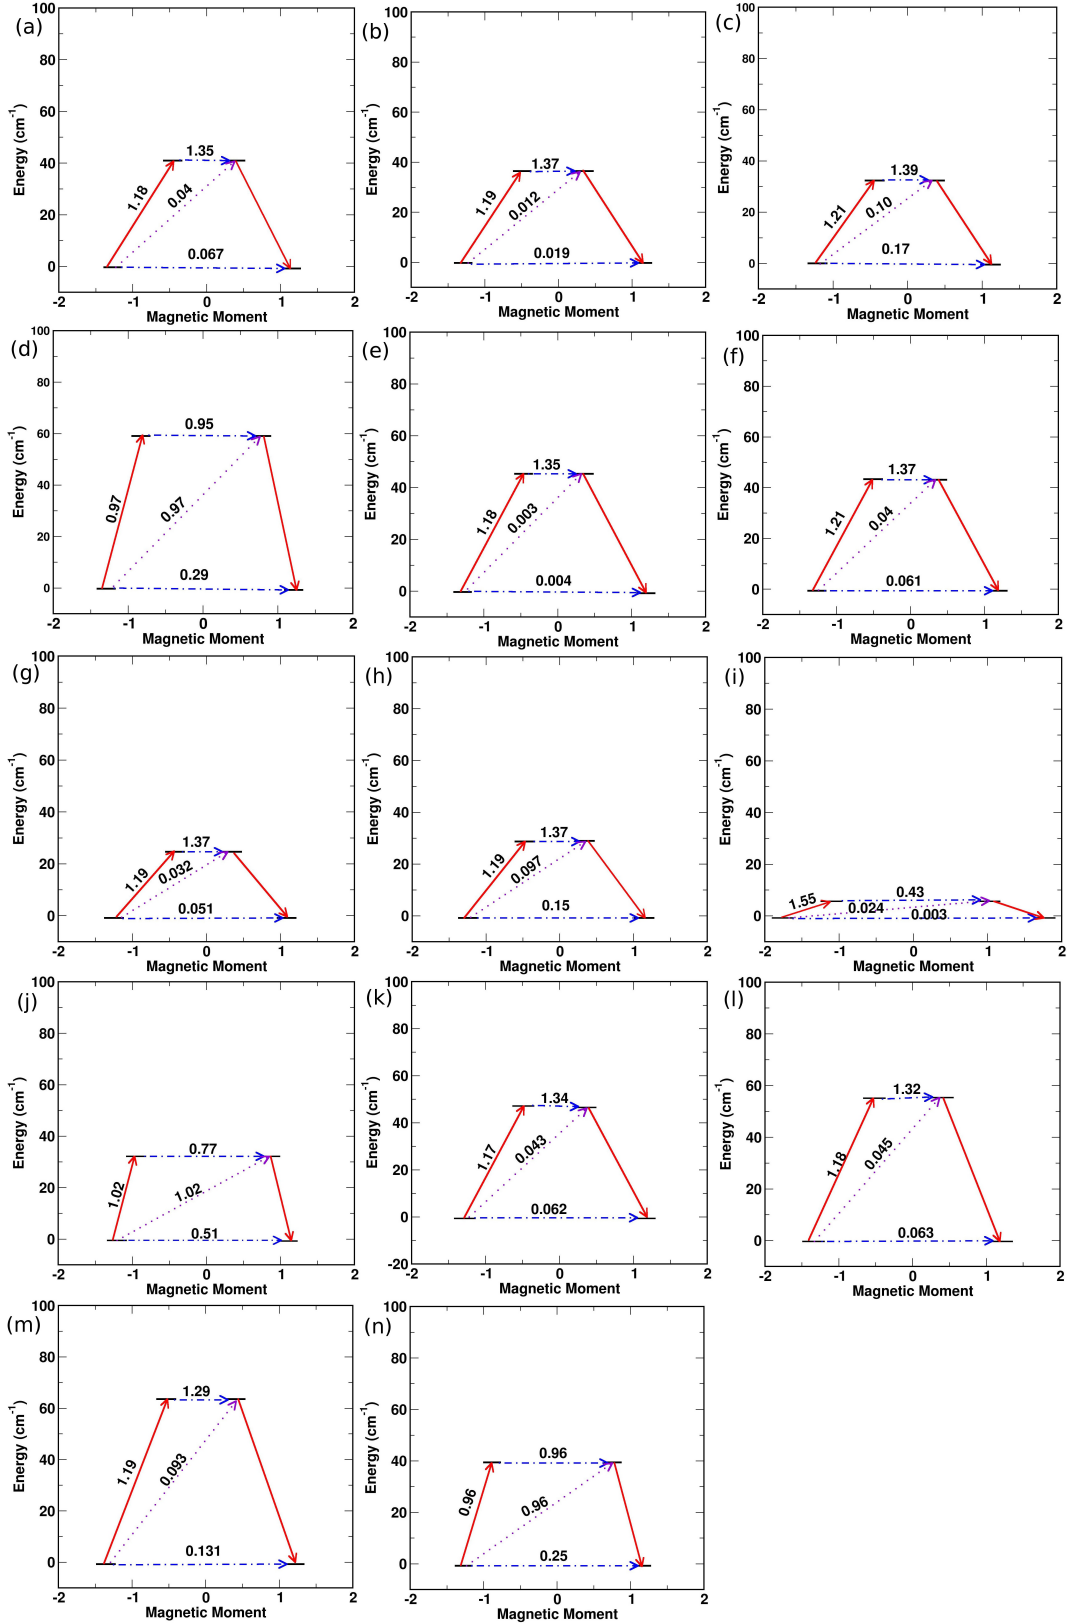

FIG. S2: The mechanism of relaxation of magnetization in the complexes (a)  $\text{Fe}_{\text{Cl}}^{\text{P}}(\text{np.})$ , (b)  $\text{Fe}_{\text{Br}}^{\text{P}}(\text{pl.})$ , (c)  $\text{Fe}_{\text{I}}^{\text{P}}(\text{pl.})$ , (d)  $\text{Fe}_{\text{I}}^{\text{P}}(\text{np.})$ , (e)  $\text{Fe}_{\text{Br}}^{\text{As}}(\text{pl.})$ , (f)  $\text{Fe}_{\text{I}}^{\text{As}}(\text{pl.})$ , (g)  $\text{Fe}_{\text{Cl}}^{\text{P,ac.}}(\text{np.})$ , (h)  $\text{Fe}_{\text{Br}}^{\text{P,ac.}}(\text{np.})$ , (i)  $\text{Fe}_{\text{I}}^{\text{P,ac.}}(\text{pl.})$ , (j)  $\text{Fe}_{\text{Cl}}^{\text{P,ac.}}(\text{np.})$  (k)  $\text{Fe}_{\text{Cl}}^{\text{As,ac.}}(\text{pl.})$ , (l)  $\text{Fe}_{\text{Br}}^{\text{As,ac.}}(\text{pl.})$ , (m)  $\text{Fe}_{\text{Cl}}^{\text{As,ac.}}(\text{pl.})$  (n)  $\text{Fe}_{\text{I}}^{\text{As,ac.}}(\text{np.})$ .

### Effect of the number of roots in CASSCF calculation on $U_{\text{eff}}$

To explore the effect of the number of IS and HS excited states on the electronic and magnetic properties of complexes, the SA-CASSCF calculation was performed with the different numbers of roots based on their relative energy separation (Table S11). It is seen that the energy gap between the spin-free states varies with the number of roots. For example, in the case of complex  $\mathbf{Fe}_{\text{Cl}}^{\text{P}}(\text{np.})$ , by taking all the possible quartet and sextet roots, the first quartet spin-free state lies  $550.5 \text{ cm}^{-1}$  above the ground state. On the other hand, with a less number of roots, such as 15Q, 10S, and 4Q roots, the energy separation between the ground and first excited spin-free state is  $342 \text{ cm}^{-1}$ , and  $365 \text{ cm}^{-1}$ , respectively. The smaller energy gap between the lowest-lying spin-free states gives rise to better mixing of states, resulting in higher splitting between the spin-orbit states. This is the reason for the higher value of magnetic anisotropic parameters ( $D$  and  $U_{\text{eff}}$ ) by taking a lesser number of roots (Table S12). It is seen in the case of  $\mathbf{Fe}_{\text{Cl}}^{\text{P}}(\text{np.})$ , the maximum number of quartet and sextet roots reproduces the experimental  $U_{\text{eff}}$  value. Thus, all the electronic and magnetic properties of all the designed complexes are analysed by taking all quartet and sextet roots.

TABLE S10: The lowest spin-free and spin-orbit energy levels (in  $\text{cm}^{-1}$ ) of the more stable planar and non-planar conformers of the Fe(III) complexes in the intermediate spin state with the different numbers of roots.

| Complex                                             | Spin-free states |        |              | Spin-orbit states |       |               |
|-----------------------------------------------------|------------------|--------|--------------|-------------------|-------|---------------|
|                                                     | 224(Q), 21(S)    | 4(Q)   | 15(Q), 10(S) | 224(Q), 21(S)     | 4(Q)  | 15(Q), 10 (S) |
| $\text{Fe}_{\text{Cl}}^{\text{P}}(\text{np.})$      | 550.5            | 365.7  | 342.0        | 40.6              | 73.2  | 80.0          |
|                                                     | 3504.7           | 5065.6 | 5668.8       | 605.1             | 467.0 | 451.5         |
|                                                     | 4400.4           | 5919.1 | 6448.3       | 662.9             | 553.5 | 543.1         |
| $\text{Fe}_{\text{Br}}^{\text{P}}(\text{np.})$      | 346.3            | 224.9  | 234.0        | 58.0              | 95.0  | 93.2          |
|                                                     | 2612.7           | 3975.4 | 4578.0       | 425.8             | 361.3 | 365.9         |
|                                                     | 3145.0           | 4493.4 | 5078.7       | 508.2             | 473.4 | 474.3         |
| $\text{Fe}_{\text{Br}}^{\text{As}}(\text{pl.})$     | 474.8            | 389.6  | 354.4        | 45.1              | 68.9  | 74.5          |
|                                                     | 2891.5           | 4144.6 | 4660.3       | 535.1             | 484.2 | 456.0         |
|                                                     | 3228.7           | 4440.0 | 4935.5       | 603.6             | 570.1 | 546.1         |
| $\text{Fe}_{\text{I}}^{\text{As}}(\text{np.})$      | 240.6            | 146.1  | 143.8        | 69.2              | 107.7 | 50.7          |
|                                                     | 1787.4           | 2744.9 | 2554.5       | 339.9             | 311.5 | 266.1         |
|                                                     | 2112.3           | 3063.6 | 2946.3       | 447.8             | 443.6 | 423.1         |
| $\text{Fe}_{\text{Cl}}^{\text{P,ac.}}(\text{pl.})$  | 349.4            | 288.4  | 203.5        | 60.3              | 85.4  | 109.2         |
|                                                     | 3696.1           | 5424.5 | 6724.6       | 430.9             | 406.1 | 357.7         |
|                                                     | 4172.1           | 5862.3 | 8333.8       | 507.6             | 504.3 | 474.0         |
| $\text{Fe}_{\text{Br}}^{\text{P,ac.}}(\text{pl.})$  | 248.4            | 227.6  | 209.1        | 72.3              | 95.1  | 91.2          |
|                                                     | 2676.7           | 4167.5 | 4497.3       | 349.6             | 361.9 | 336.3         |
|                                                     | 3030.1           | 4471.1 | 4983.1       | 445.9             | 473.7 | 448.3         |
| $\text{Fe}_{\text{Cl}}^{\text{As,ac.}}(\text{pl.})$ | 486.5            | 376.0  | 349.5        | 46.8              | 71.9  | 79.4          |
|                                                     | 3924.5           | 5314.9 | 5804.4       | 549.1             | 474.4 | 455.9         |
|                                                     | 4366.3           | 5768.6 | 6230.8       | 611.9             | 559.3 | 546.3         |
| $\text{Fe}_{\text{Br}}^{\text{As,ac.}}(\text{pl.})$ | 377.6            | 307.8  | 212.9        | 55.0              | 80.6  | 96.2          |
|                                                     | 2909.4           | 4114.6 | 4599.3       | 452.3             | 419.5 | 350.5         |
|                                                     | 3211.4           | 4410.6 | 4724.9       | 530.3             | 517.0 | 464.4         |
| $\text{Fe}_{\text{I}}^{\text{As,ac.}}(\text{pl.})$  | 281.4            | 232.0  | 2194.7       | 62.5              | 91.4  | 82.1          |
|                                                     | 1830.3           | 2825.7 | 5157.9       | 368.2             | 362.5 | 2211.3        |
|                                                     | 2059.5           | 3025.8 | 6645.7       | 469.8             | 478.3 | 2322.2        |

TABLE S11: The magnetic-anisotropic parameters ( $U_{\text{eff}}$ ,  $D$ ,  $E$ ) in  $\text{cm}^{-1}$  with different numbers of the quartet (Q) and sextet (S) states. A smaller number of states in the state-averaged calculations tend to overestimate the effective anisotropy barrier. The experimental value of the effective anisotropy barrier for  $\mathbf{Fe}_{\text{Cl}}^{\text{P}}(\text{np.})$  is  $46 \text{ cm}^{-1}$ .

| Complex                                               | 224(Q), 21(S)    |       |       | 4(Q)             |     |       | 15(Q), 10(S)     |     |        |
|-------------------------------------------------------|------------------|-------|-------|------------------|-----|-------|------------------|-----|--------|
|                                                       | $U_{\text{eff}}$ | $D$   | $E$   | $U_{\text{eff}}$ | $D$ | $E$   | $U_{\text{eff}}$ | $D$ | $E$    |
| $\mathbf{Fe}_{\text{Cl}}^{\text{P}}(\text{np.})$      | 41               | -20   | 0.66  | 73               | -37 | 0.47  | 81               | -40 | 0.35   |
| $\mathbf{Fe}_{\text{Br}}^{\text{P}}(\text{np.})$      | 58               | -29   | -0.54 | 95               | -48 | -0.27 | 93               | -47 | -0.14  |
| $\mathbf{Fe}_{\text{Br}}^{\text{As}}(\text{pl.})$     | 45               | -23   | 0.06  | 69               | -35 | 0.14  | 75               | -37 | 0.24   |
| $\mathbf{Fe}_{\text{I}}^{\text{As}}(\text{np.})$      | 69               | -34.6 | -0.95 | 108              | -54 | -0.56 | 51               | -25 | 3.68   |
| $\mathbf{Fe}_{\text{Cl}}^{\text{P,ac.}}(\text{pl.})$  | 60               | -30   | 0.76  | 86               | -43 | 0.48  | 109              | -55 | -0.41  |
| $\mathbf{Fe}_{\text{Br}}^{\text{P,ac.}}(\text{pl.})$  | 72               | -36.1 | 1.34  | 95               | -48 | 0.62  | 91               | -46 | 1.40   |
| $\mathbf{Fe}_{\text{Cl}}^{\text{As,ac.}}(\text{pl.})$ | 47               | -23   | 0.71  | 72               | -36 | 0.53  | 79               | -40 | 0.37   |
| $\mathbf{Fe}_{\text{Br}}^{\text{As,ac.}}(\text{pl.})$ | 55               | -27   | 0.90  | 81               | -40 | 0.53  | 96               | -48 | 0.30   |
| $\mathbf{Fe}_{\text{I}}^{\text{As,ac.}}(\text{pl.})$  | 63               | -31   | 1.96  | 91               | -46 | 0.77  | 82               | 31  | -15.88 |

## Double $d$ -shell effect

For first-row transition metal complexes, the inclusion of a second set of  $d$  orbitals is considered to be important in recovering the electron correlation and estimation of that can determine the accuracy of electronic excitation energies from respective orbitals, commonly known as the double  $d$ -shell effect. To investigate the impact of the double  $d$ -shell on the magnetic anisotropy parameters, we expanded our active space from (9,7) to (9,12) by accommodating the five  $4d$  orbitals of the metal ion. The (9,7) active space can give rise to 224 quartets, which can be subjected to SA-CASSCF calculation. However, for the (9,12) active space, the number of possible configuration state functions being significantly large (151008), they can not be included in the state-average calculations, as per the latest implementation. Hence, we considered the (a) two and (b) four low-lying quartet states of the non-planar  $\text{Fe}_{\text{Cl}}^{\text{P}}$  for SA-CASSCF calculation with the (9,12) active space and for consistency, we computed the same with (9,7) active space as well (i.e., 2Q-SA-(9,7) and 4Q-SA-(9,7)). The corresponding spin-free states, spin-orbit states,  $D$ ,  $E$  and  $U_{\text{eff}}$  parameters are summarized in Table S12 in ESI. The computed  $D$  and  $U_{\text{eff}}$  by these two active spaces are observed to be similar, which suggests that the nature of the CASSCF wavefunction did not change upon inclusion of the double  $d$ -shell effect. However, considering a limited number of roots (2Q-SA-(9,7) or 4Q-SA-(9,7)), the  $D$  and  $U_{\text{eff}}$  are overestimated as compared to their experimental values. It is to be noted that the nature of the CASSCF wave function largely depends on the number of states considered for the the state-average calculation, and it has been demonstrated in Table S10 and S11, that such state-truncation error in SA-CASSCF calculation results in a significant impact on the scalar-relativistic states, spin-orbit states, hence on the  $D$  and  $U_{\text{eff}}$  parameters as well. Hence, in this work, we are reporting the results determined by the 224Q-SA-(9,7) wavefunctions for all the complexes.

TABLE S12: Comparison of the lowest spin-free, spin-orbit energy levels (in  $\text{cm}^{-1}$ ) and zero-field splitting parameters (in  $\text{cm}^{-1}$ ) of the experimentally reported  $\text{Fe}_{\text{Cl}}^{\text{P}}(\text{np.})$  complex in the intermediate spin state with CAS(9,7) and CAS(9,12) active space with 2 and 4 number of roots.

| 2(Q)       |                  |                   |       |     |                  | 4(Q)             |                   |       |      |                  |
|------------|------------------|-------------------|-------|-----|------------------|------------------|-------------------|-------|------|------------------|
| CAS        | Spin-free states | Spin-orbit states | $D$   | $E$ | $U_{\text{eff}}$ | Spin-free states | Spin-orbit states | $D$   | $E$  | $U_{\text{eff}}$ |
| CAS (9,7)  | 304.4            | 84.7              | -42.3 | 0.0 | 84.7             | 365.7            | 73.2              | -36.6 | 0.47 | 73.2             |
|            | -                | 416.8             |       |     |                  | 5065.6           | 467.0             |       |      |                  |
|            |                  |                   |       |     |                  | 5919.1           | 553.3             |       |      |                  |
| CAS (9,12) | 352.9            | 69.8              | -34.9 | 0.0 | 69.8             | 397.7            | 61.0              | -30.5 | 0.38 | 61.0             |
|            | -                | 444.2             |       |     |                  | 5693.1           | 481.4             |       |      |                  |
|            |                  |                   |       |     |                  | 6578.9           | 553.3             |       |      |                  |

## Dynamic Electron Correlation

In multiconfigurational complete-active-space based methods, the electronic correlation is evaluated in two steps. The first step is CASSCF, in which a suitable wavefunction is determined by careful choice of orbital in the active space. It takes care of the static electron correlation. To obtain reliable energies, additional dynamical correlation not recovered at the CASSCF level must be included. This can be done on top of a CASSCF reference wavefunction by using second-order perturbation theory approaches, such as complete active space second-order perturbation theory (CASPT2) or N-electron valence perturbation theory (NEVPT2). It should be pointed out that there exist alternative methods, such as equation-of-motion coupled-cluster-based approaches that can efficiently describe electronic excited states and recover both static and dynamic electron correlation [1]. However, in the context of this article, we are specifically employing the complete-active-space based approach. Therefore, to investigate the effect of dynamic electron correlation on the spin-state energetics, we subjected the 224Q-SA-(9,7) computed wavefunctions of both the planar and non-planar  $\text{Fe}_{\text{C1}}^{\text{P}}$  conformers to the multi-state (MS)- and extended multi-state (XMS)-CASPT2 calculations with OpenMolcas program [2, 3]. In all the MS- and XMS-CASPT2 calculations the standard definition of zero-order Hamiltonian (IPEA = 0.25 a.u.) is used. To exclude the possible intruder states a vertical shift of 0.5 a.u. is applied. For the non-planar complex, the MS-CASPT2 computed  $\Delta E_{Q_1-Q_0}$  is observed to vary between 587-617  $\text{cm}^{-1}$ , upon the number of states considered for the calculation. On the other hand, the magnitude of  $\Delta E_{Q_1-Q_0}$  varies between 670 to 981  $\text{cm}^{-1}$  when computed with XMS-CASPT2 method, starting from the same reference CASSCF wavefunction. Similarly, for the planar complex, the MS-CASPT2 computed  $\Delta E_{Q_1-Q_0}$  varies between 379 to 398  $\text{cm}^{-1}$ , and the same with XMS-CASPT2 method is 445 to 533  $\text{cm}^{-1}$ . The discrepancies between the MS-, and XMS-CASPT2 energy levels are not unusual [4]. Observing these deviations between the two CASPT2 approaches, we also performed NEVPT2 calculations starting from the same CASSCF wave function. However, the NEVPT2 computed energetics also appeared to differ significantly from those shown by the two CASPT2 methods (Table S13 in ESI). It is already established that the  $\Delta E_{Q_1-Q_0}$  plays a significant role in determining the spin-orbit energy levels, hence the magnitudes of  $D$  and  $U_{\text{eff}}$  as well. Therefore, based on the inconsistencies shown, the second-order perturbation theory was excluded from determining the spin-state energetics and the magnetic anisotropy parameters with reasonable accuracy. Hence, in



TABLE S13: Comparison of MS-CASPT2, XMS-CASPT2 and NEVPT2, results with different number of roots for  $\mathbf{Fe}_{Cl}^P(\text{pl.})$ ,  $\mathbf{Fe}_{Cl}^P(\text{np.})$  complexes. NEVPT2 calculations did not converge when 80 quartets were considered.

| Method     | $\mathbf{Fe}_{Cl}^P(\text{pl.})$ |       |       |       |                   |       |       |       | $\mathbf{Fe}_{Cl}^P(\text{np.})$ |       |       |       |                   |      |       |       |
|------------|----------------------------------|-------|-------|-------|-------------------|-------|-------|-------|----------------------------------|-------|-------|-------|-------------------|------|-------|-------|
|            | Spin-free states                 |       |       |       | Spin-orbit states |       |       |       | Spin-free states                 |       |       |       | Spin-orbit states |      |       |       |
|            | 2(Q)                             | 4(Q)  | 12(Q) | 80(Q) | 2(Q)              | 4(Q)  | 12(Q) | 80(Q) | 2(Q)                             | 4(Q)  | 12(Q) | 80(Q) | 2(Q)              | 4(Q) | 12(Q) | 80(Q) |
| MS-CASPT2  | 0.0                              | 0.0   | 0.0   | 0.0   | 0.0               | 0.0   | 0.0   | 0.0   | 0.0                              | 0.0   | 0.0   | 0.0   | 0.0               | 0.0  | 0.0   | 0.0   |
|            | 394.1                            | 394.1 | 397.9 | 378.7 | 58.5              | 56.1  | 54.5  | 53.9  | 616.9                            | 616.9 | 616.3 | 588.6 | 41.2              | 37.8 | 36.7  | 36.2  |
|            | 7066.8 7071.1 7114.3             |       |       |       |                   |       |       |       | 6615.8 6615.6 6672.5             |       |       |       |                   |      |       |       |
|            | 7097.2 7085.9 7135.9             |       |       |       |                   |       |       |       | 7733.9 7733.3 7783.3             |       |       |       |                   |      |       |       |
| XMS-CASPT2 | 0.0                              | 0.0   | 0.0   | 0.0   | 0.0               | 0.0   | 0.0   | 0.0   | 0.0                              | 0.0   | 0.0   | 0.0   | 0.0               | 0.0  | 0.0   | 0.0   |
|            | 465.9                            | 476.5 | 533.1 | 444.5 | 51.7              | 48.5  | 42.8  | 47.5  | 670.1                            | 758.8 | 981.2 | 688.6 | 38.3              | 31.2 | 22.8  | 31.3  |
|            | 8230.0 8271.0 8315.6             |       |       |       |                   |       |       |       | 7792.2 8140.2 8002.6             |       |       |       |                   |      |       |       |
|            | 8295.8 8371.9 8464.5             |       |       |       |                   |       |       |       | 8894.3 8872.6 9063.7             |       |       |       |                   |      |       |       |
| NEVPT2     | 0.0                              | 0.0   | 0.0   |       | 0.0               | 0.0   | 0.0   |       | 0.0                              | 0.0   | 0.0   |       | 0.0               | 0.0  | 0.0   |       |
|            | 78.8                             | 68.04 | 101.0 |       | 127.1             | 127.2 | 118.7 |       | 334.7                            | 368.5 | 458.7 |       | -                 | 87.2 | 78.5  | 58.4  |
|            | 6257.6 7169.6                    |       |       |       |                   |       |       |       | 5711.0 6741.8                    |       |       |       |                   |      |       |       |
|            | 6448.1 7594.9                    |       |       |       |                   |       |       |       | 6870.8 7883.9                    |       |       |       |                   |      |       |       |

this article, we report the spin-state energetics and the magnetic anisotropy parameters determined by the CASSCF energies.

- 
- [1] P. Pokhilko, E. Epifanovsky, and A. I. Krylov, *J. Chem. Phys.* **151**, 034106 (2019).
- [2] F. Aquilante, J. Autschbach, A. Baiardi, S. Battaglia, V. A. Borin, L. F. Chibotaru, I. Conti, L. De Vico, M. Delcey, I. Fdez. Galván, N. Ferré, L. Freitag, M. Garavelli, X. Gong, S. Knecht, E. D. Larsson, R. Lindh, M. Lundberg, P. Malmqvist, A. Nenov, J. Norell, M. Odellius, M. Olivucci, T. B. Pedersen, L. Pedraza-González, Q. M. Phung, K. Pierloot, M. Reiher, I. Schapiro, J. Segarra-Martí, F. Segatta, L. Seijo, S. Sen, D.-C. Sergentu, C. J. Stein, L. Ungur, M. Vacher, A. Valentini, and V. Veryazov, *J. Chem. Phys.* **152**, 214117 (2020).
- [3] I. F. Galván, M. Vacher, A. Alavi, C. Angeli, F. Aquilante, J. Autschbach, J. J. Bao, S. I. Bokarev, N. A. Bogdanov, R. K. Carlson, L. F. Chibotaru, J. Creutzberg, N. Dattani, M. G. Delcey, S. S. Dong, A. Dreuw, L. Freitag, L. M. Frutos, L. Gagliardi, F. Gendron, A. Giussani, L. González, G. Grell, M. Guo, C. E. Hoyer, M. Johansson, S. Keller, S. Knecht, G. Kovačević, E. Källman, G. L. Manni, M. Lundberg, Y. Ma, S. Mai, J. P. Malhado, P. Å. Malmqvist, P. Marquetand, S. A. Mewes, J. Norell, M. Olivucci, M. Oppel, Q. M. Phung, K. Pierloot, F. Plasser, M. Reiher, A. M. Sand, I. Schapiro, P. Sharma, C. J. Stein, L. K. Sørensen, D. G. Truhlar, M. Ugandi, L. Ungur, A. Valentini, S. Vancoillie, V. Veryazov, O. Weser, T. A. Wesolowski, P.-O. Widmark, S. Wouters, A. Zech, J. P. Zobel, and R. Lindh, *J. Chem. Theory Comput.* **15**, 5925 (2019).
- [4] M. Godsall and N. F. Chilton, *J. Phys. Chem. A* **126**, 6059 (2022).
